# Supplementary material for: The a3 isoform of subunit a of the vacuolar ATPase localizes to the plasma membrane of invasive breast tumor cells and is overexpressed in human breast cancer
Source: Oncotarget. 2016 Jun 15;7(29):46142–57. doi: 10.18632/oncotarget.10063 (PMC5216787; doi:10.18632/oncotarget.10063)
Supplement: Supplementary file 1 [file oncotarget-07-46142-s001.pdf]

# The a3 isoform of subunit a of the vacuolar ATPase localizes to the plasma membrane of invasive breast tumor cells and is overexpressed in human breast cancer

## SUPPLEMENTARY FIGURE

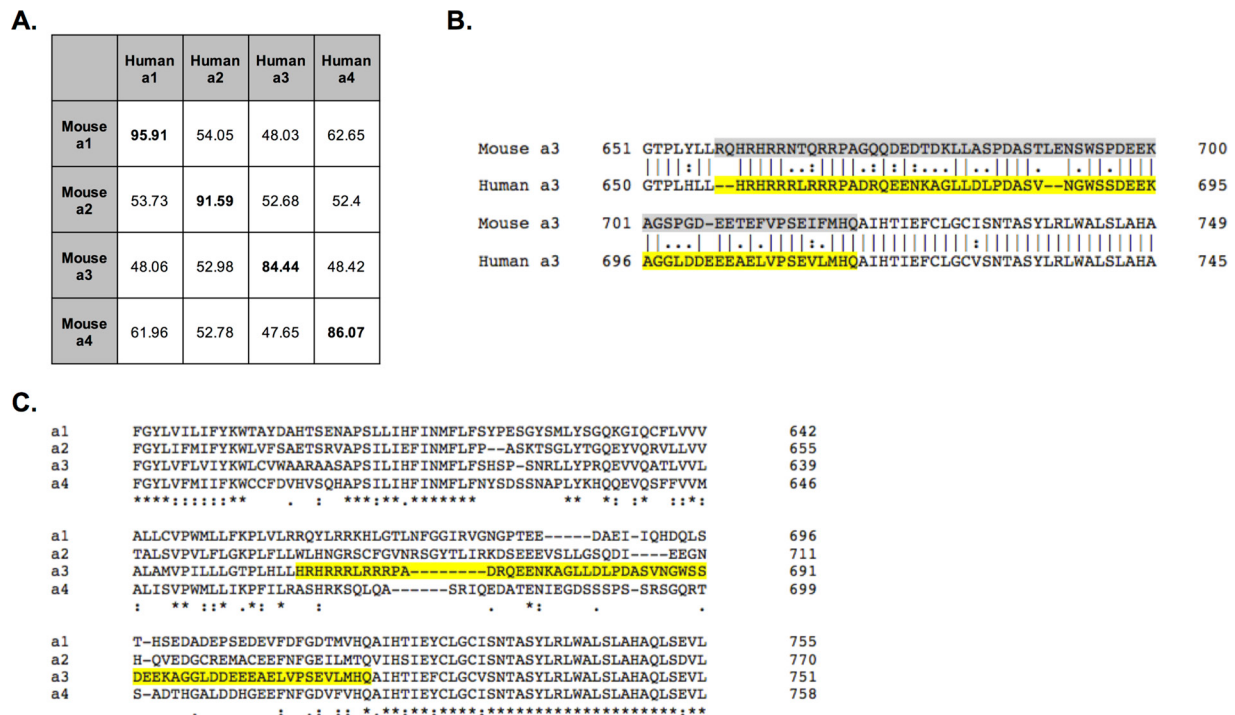

**Supplementary Figure S1: Sequence comparison of human and mouse V-ATPase a subunit isoforms.** **A.** Percent identity between the mouse and human protein sequences for subunit a isoforms a1-a4 were determined using Clustal Omega multi-sequence alignment [37–39]. **B.** Mouse and human a3 protein sequences were aligned using the EMBOSS Water pairwise alignment [39]. Region displayed contains the mouse sequence against which the chicken monoclonal antibody was prepared (highlighted in grey). The region highlighted in yellow indicates the corresponding human sequence. *Straight lines* (|) indicate identical residues. *Colons* (:) indicate strongly conserved residues. *Periods* (.) indicate weakly conserved residues [37–39]. **C.** Human protein sequences for a1-a4 were aligned using Clustal Omega multi-sequence alignment. The region highlighted in yellow indicates the corresponding human sequence to which the antibody was prepared. *Asterisks* (\*) indicate identical residues. *Colons* (:) indicate strongly conserved residues. *Periods* (.) indicate weakly conserved residues [37–39].
